# Supplementary material for: A systems approach to designing next generation vaccines: combining α-galactose modified antigens with nanoparticle platforms
Source: PubMed Central journal article supplement — Sci Rep. 2014 Jan 20;4:3775. doi: 10.1038/srep03775 (PMC3895907; doi:10.1038/srep03775), 2014-01-20
Supplement: srep03775-s1.pdf [file srep03775-s1.pdf]

**A systems approach to designing next generation vaccines: combining  $\alpha$ -galactose modified antigens with nanoparticle platforms**

Yashdeep Phanse<sup>1</sup>, Brenda R. Carrillo-Conde<sup>2</sup>, Amanda E. Ramer-Tait<sup>1,5</sup>, Scott Broderick<sup>3</sup>, Chang Sun Kong<sup>3</sup>, Krishna Rajan<sup>3</sup>, Ramon Flick<sup>4</sup>, Robert B. Mandell<sup>4,6</sup>, Balaji Narasimhan<sup>2</sup> and Michael J. Wannemuehler<sup>1</sup>

<sup>1</sup>Department of Veterinary Microbiology and Preventive Medicine, Iowa State University, Ames, IA 50011

<sup>2</sup>Department of Chemical and Biological Engineering, Iowa State University, Ames, IA 50011

<sup>3</sup>Department of Materials Science and Engineering, Iowa State University, Ames, IA 50011

<sup>4</sup>BioProtection Systems Corporation, a subsidiary of NewLink Genetics Corporation, Ames, IA 50010

<sup>5</sup>Department of Food Science and Technology, University of Nebraska-Lincoln, Lincoln, NE 68583

<sup>6</sup>Current address: Boehringer Ingelheim, Ames, IA 50010

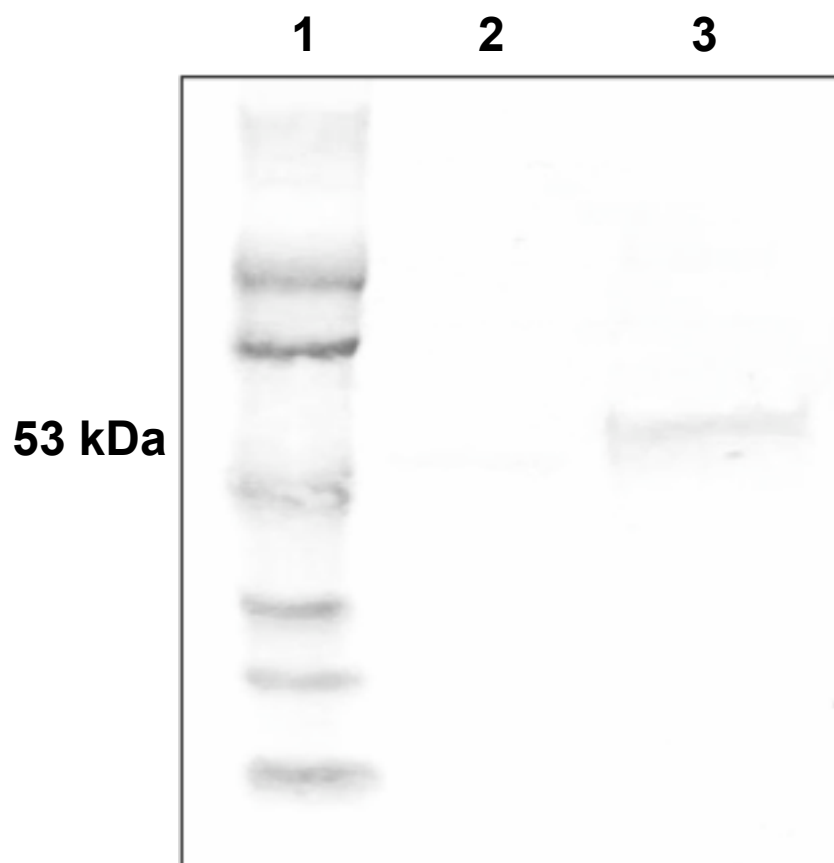

**SI Figure 1. Western blot analysis of unmodified F1-V and  $\alpha$ Gal-modified F1-V confirmed attachment of  $\alpha$ Gal epitopes.** Unmodified F1-V (lane 2) or  $\alpha$ Gal-F1-V (lane 3) were separated by sodium dodecyl sulfate–polyacrylamide gel electrophoresis (SDS-PAGE) then detected by Western blotting using anti- $\alpha$ Gal sera. Lane 1: molecular size standards. Label on the left indicates the expected size of  $\alpha$ Gal-F1-V.

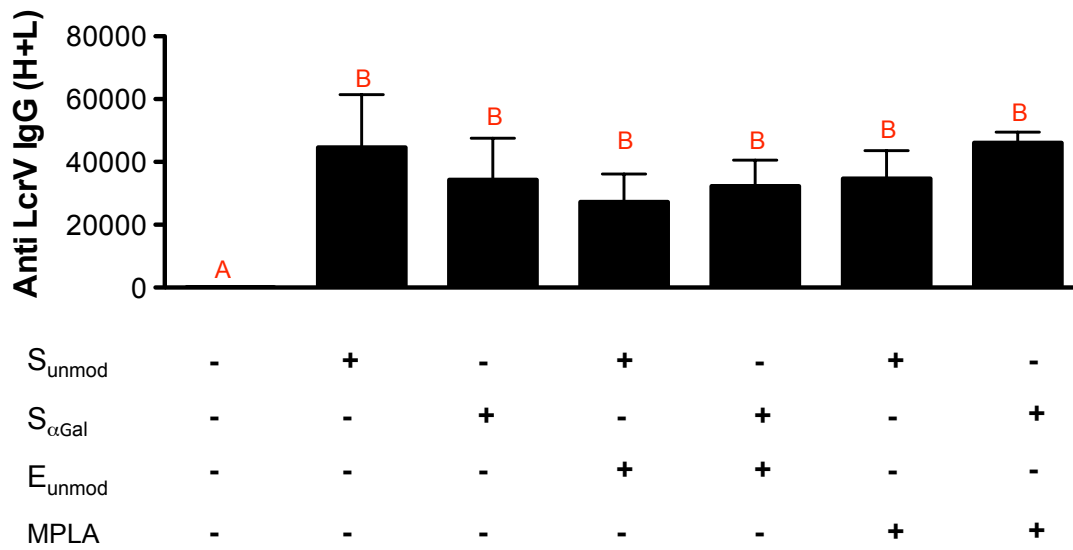

**SI Figure 2. Anti-LcrV IgG (H+L) antibody titers.** Titers were determined by end-point ELISA 42 days after vaccination. Data are presented as the mean  $\pm$  SEM of four independent experiments. Treatments identified with different letters are significantly different from one another ( $p \leq 0.05$ ).

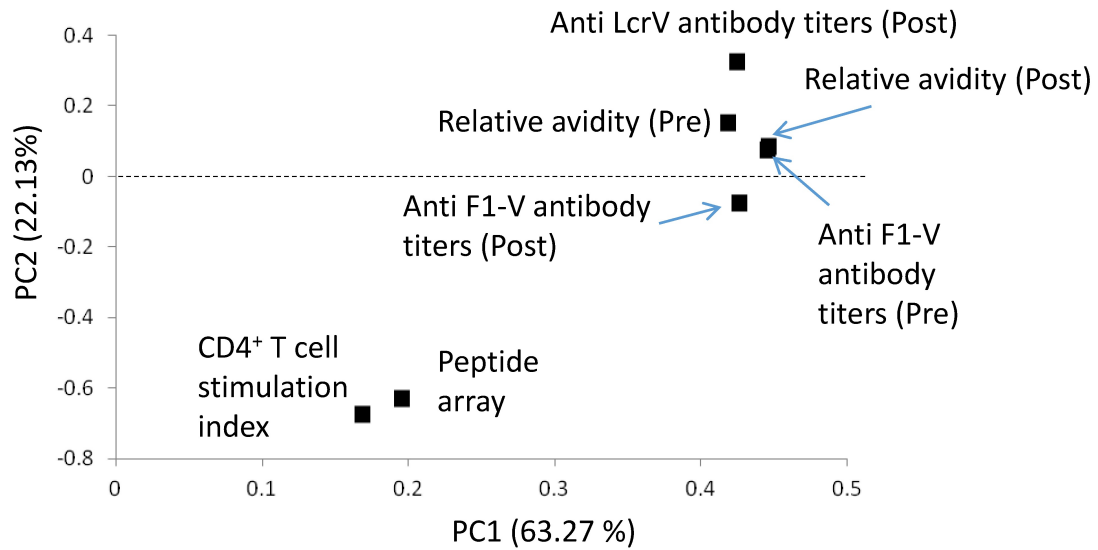

**SI Figure 3.** PCA plot of the loadings, which describes the variables, such as antibody titer, antibody avidity, T cell proliferation, and epitope recognition, utilized to draw inferences about optimal vaccine formulations.
